# Supplementary material for: Effect of LLZO on the in situ polymerization of acrylate solid-state electrolytes on cathodes
Source: Royal Society of Chemistry journal article supplement (doi:10.1039/d2ra07861a), 2023-01-01

## Supporting information

### **The effect of LLZO on the in-situ polymerization of acrylate solid state electrolyte on cathode**

Xiaoyu Zhou<sup>†</sup>, Kaiyun Xu<sup>†</sup>, Menghan Ge<sup>a</sup>, Ziwen Qiu<sup>a</sup>, Ya Mao<sup>b</sup>, Hefeng

Wang<sup>a</sup>, Yinping Qin<sup>a</sup>, Jingjing Zhou<sup>a\*</sup>, Yang Liu<sup>a,c,d\*</sup>, Bingkun Guo<sup>a\*</sup>

- a. Materials Genome Institute, Shanghai University, Shanghai, 99 Shangda Road, Baoshan District, Shanghai, China.
- b. Shanghai Institute of Space Power Sources, Shanghai 200245, China.
- c. Key Laboratory of Advanced Energy Materials Chemistry (Ministry of Education), Nankai University, Tianjin 300071, China.
- d. Key Laboratory of Optoelectronic Chemical Materials and Devices of Ministry of Education, Jiangnan University, No. 8, Sanjiaohu Rd., Wuhan, Hubei, 430056, P. R. China.

Corresponding Author

Jingjing Zhou, email: zjzjj@t.shu.edu.cn

Yang Liu, email: liuyang81@shu.edu.cn

Bingkun Guo, email: guobingkun@shu.edu.cn

<sup>†</sup>These authors contributed equally to this paper.

**Figure S1** FTIR of PEO, PA2, PA2-PEO samples with different contents of LLZO added.

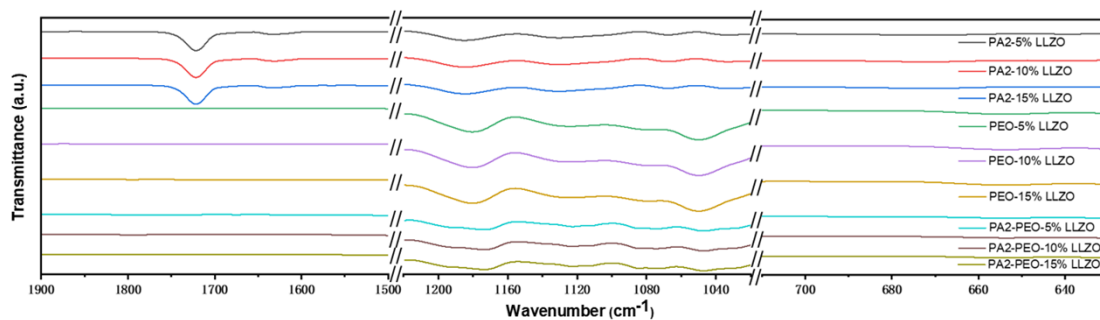

**Figure S2** DMA curves of PA2-PEO-10%LLZO and PA2-PEO at 25°C, elongation rate 3 mm min<sup>-1</sup>.

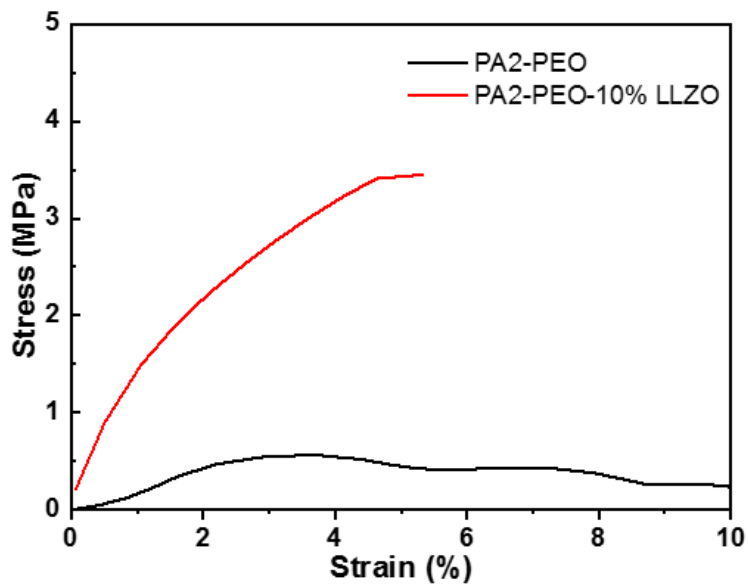

**Figure S3** The charge-discharge curves of  $\text{LiFePO}_4/\text{PA2-PEO-10\%LLZO/Li}$  cells at 0.1 C, 25 °C between 2.2-4 V vs.  $\text{Li}^+/\text{Li}$ .

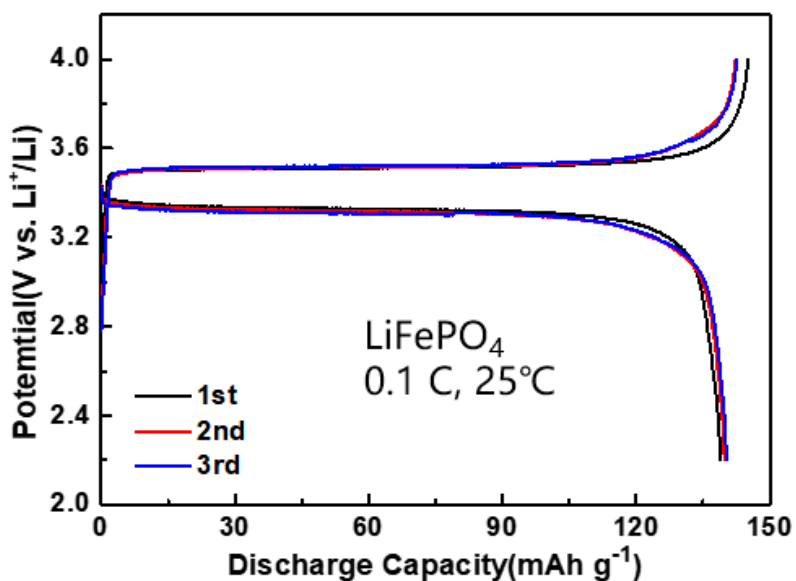

**Figure S4** The cyclic performance of  $\text{NCM111}/\text{PA2-PEO-10\%LLZO/Li}$  between 2.5-4.4 V vs.  $\text{Li}^+/\text{Li}$  at 1 C, 60 °C.

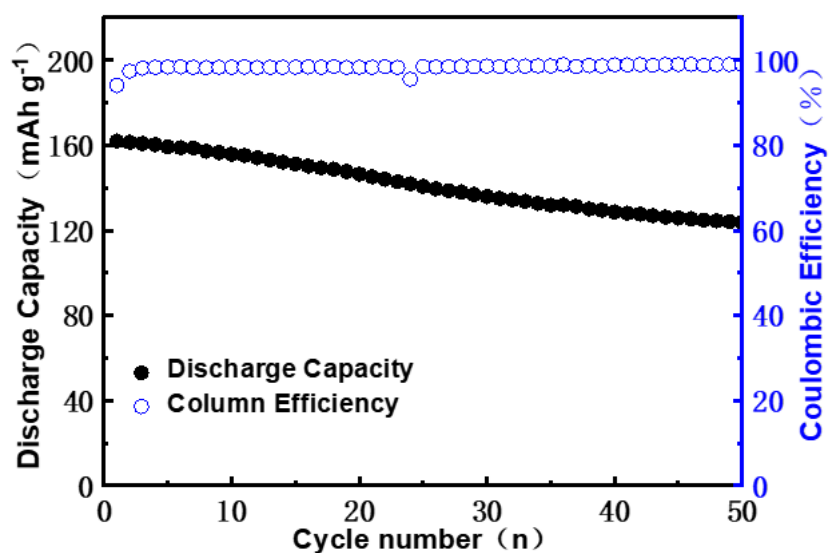

**Figure S5** The rate performance of NCM111/PA2-PEO-10%LLZO/Li cells at 60 °C between 2.5-4.2 V vs. Li<sup>+</sup>/Li.

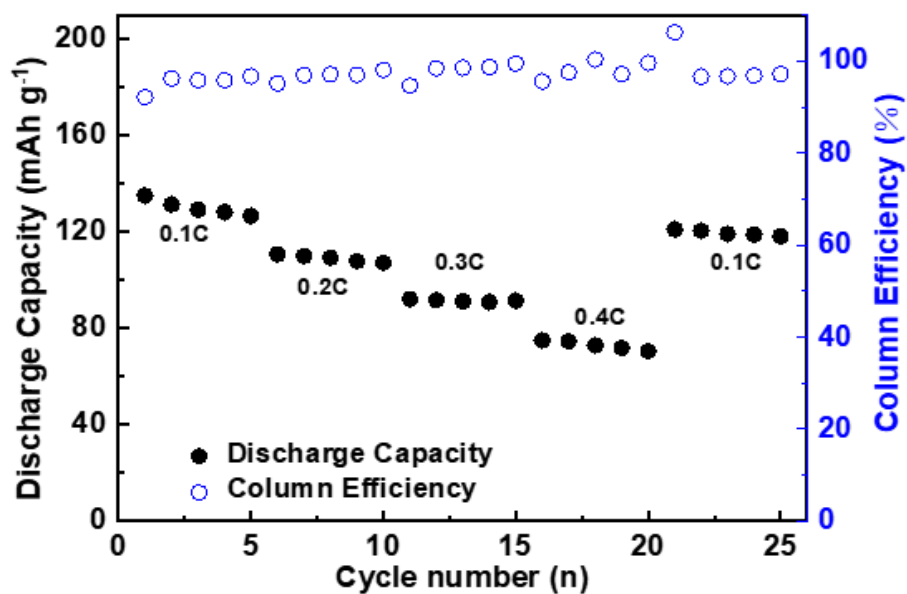

**Figure S6** The cyclic performance of NCM111/PA2-PEO-10%LLZO/Li between 2.5-4.2 V vs. Li<sup>+</sup>/Li at 1 C, 60 °C.

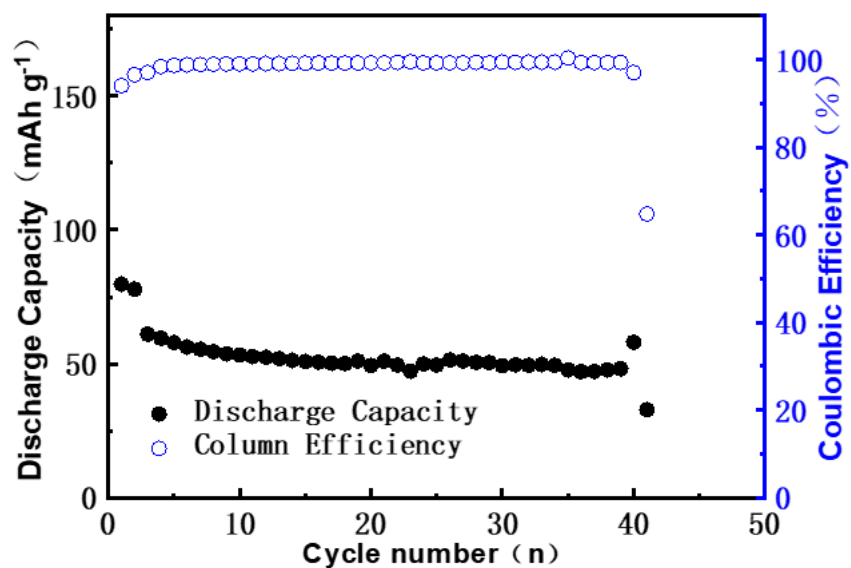

**Figure S7** The cyclic performance of (a) LiFePO<sub>4</sub>/PA2-PEO-5%LLZO/Li and (b) LiFePO<sub>4</sub>/PA2-PEO-15%LLZO/Li cells at 0.1 C, 25 °C between 2.2-4 V vs. Li<sup>+</sup>/Li; (c) NCM111/PA2-PEO-5%LLZO/Li and (d) NCM111/PA2-PEO-5%LLZO/Li cells at 1 C, 60 °C between 2.5-4.2 V vs. Li<sup>+</sup>/Li.

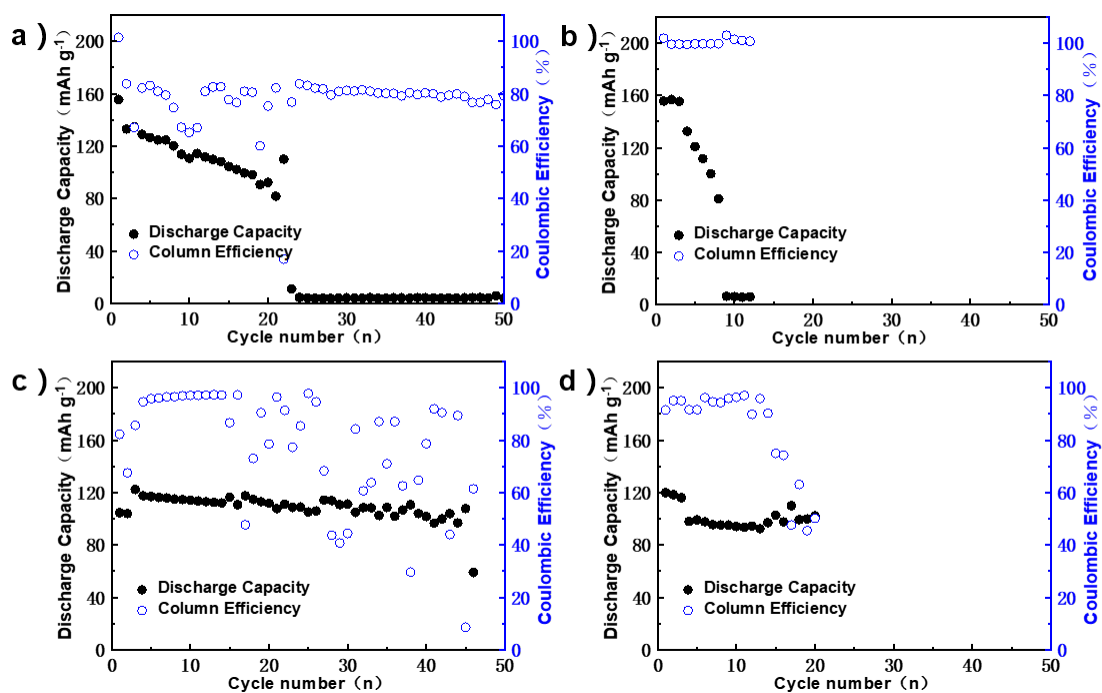

Supplement: d2ra07861a1.pdf [file d2ra07861a1.pdf]
